# Supplementary material for: Southern high-latitude terrestrial climate change during the Palaeocene–Eocene derived from a marine pollen record (ODP Site 1172, East Tasman Plateau)
Source: Copernicus journal article supplement (doi:10.5194/cp-10-1401-2014), 2014-07-24
Supplement: Supplementary file 1 [file cp-10-1401-2014-supplement.zip]

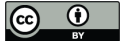

## *Supplement of*

# **Southern high-latitude terrestrial climate change during the Palaeocene–Eocene derived from a marine pollen record (ODP Site 1172, East Tasman Plateau)**

**L. Contreras et al.**

*Correspondence to:* L. Contreras ([contrerasarias@em.uni-frankfurt.de](mailto:contrerasarias@em.uni-frankfurt.de))

- Supplement-Cover-Letter.pdf
- Supplementary Information
  - .DS\_Store
  - revised SI.pdf
  - supplemdata.xlsx
- \_\_MACOSX
  - Supplementary Information
    - \* .\_DS\_Store
    - \* .\_revised SI.pdf
    - \* .\_supplemdata.xlsx
